# Supplementary material for: Effects of Constitutive and Acute Connexin 36 Deficiency on Brain-Wide Susceptibility to PTZ-Induced Neuronal Hyperactivity
Source: PubMed Central journal article supplement (PMC7829467; doi:10.3389/fnmol.2020.587978), 2021-01-11
Supplement: Image_1.pdf [file Image_1.pdf]

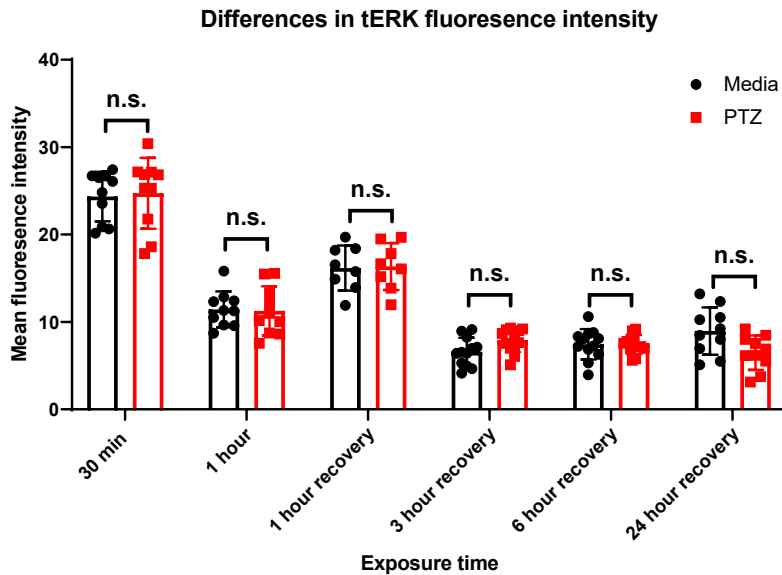

**Supplementary Figure 1.** Comparison of tERK staining intensity. Graph depicting mean tERK staining intensity between all Cx36 co-stained groups. There is no significant differences between media and PTZ treated groups for each exposure and recovery condition.

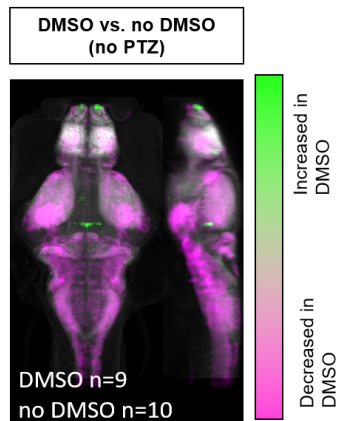

**Supplementary Figure 2.** Whole-brain activity map showing effects of DMSO in wild-type animals. Dorsal and lateral view of zebrafish larvae brain. Images show regions with increased (green) and decreased (magenta) activity in DMSO treated wild-type animals versus embryo media (no DMSO) treated wild-type animals (DMSO n=9; no DMSO n=10).
